# Supplementary material
Source: Springer Nature journal article supplement (https://www.springermedizin.de/resource/supplementary/13002_2012_297_MOESM1_ESM.pdf/9627568)
Supplement: MOESM1 [file 9627568]

### Location of the Study Area

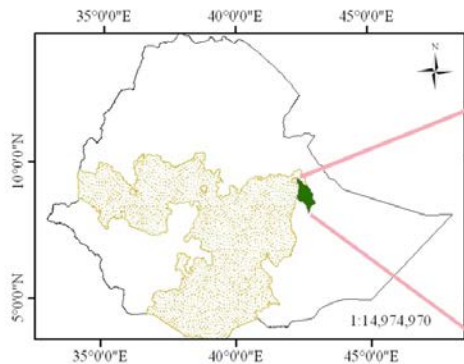

- Ethiopia
- Oromiya
- Babile Woreda

GCS: WGS 1984 UTM Zone 37N  
Projection: Transverse\_Mercator

### District of Babile - the Study Area

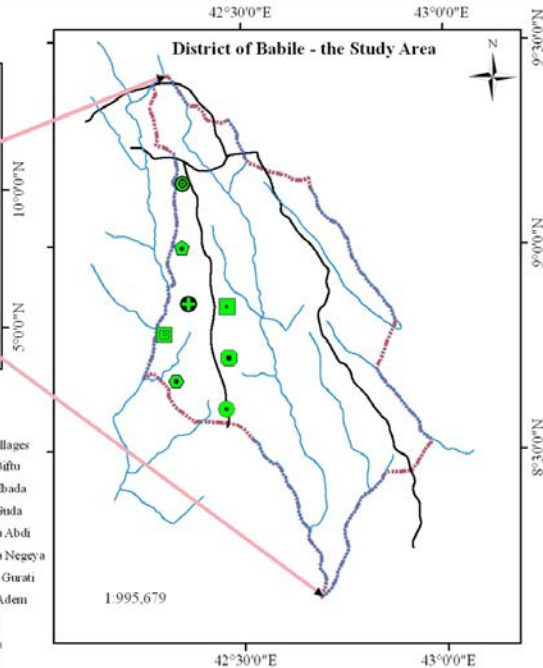

#### Study Site/Villages

- Erer Biftu
- Erer Ebada
- Erer Guda
- Genda Abdi
- Genda Negeya
- Kurfa Gurati
- Rare Adem
- Wolbi
- Rivers
- Road
- Babile Woreda
